# Supplementary material
Source: PubMed Central journal article supplement (PMC9840565)
Supplement: NIHMS1854297-supplement-Supplemental_Material_2.pdf [file NIHMS1854297-supplement-Supplemental_Material_2.pdf]

SUPPLEMENTARY MATERIALS FOR

Do psychosocial factors mediate sexual minorities' risky sexual behaviour? A twin study

## Supplementary Table S1

### Item-level Missingness

| Variable                     | Phase of assessment | Total no of participants                   | Total number in analyses | Item missingness n (%) |
|------------------------------|---------------------|--------------------------------------------|--------------------------|------------------------|
| Sexual orientation           | 1                   | 9525 (216 – no interest/unsure)            | 9309                     | 388 (4.00)*            |
| Depressive symptoms          | 1                   | qc=77, no response=14, less than 6 items=3 | 9395                     | 302 (3.11)             |
| Item 1                       |                     | 9486                                       |                          | 211 (2.18)             |
| Item 2                       |                     | 9488                                       |                          | 209 (2.16)             |
| Item 3                       |                     | 9488                                       |                          | 209 (2.16)             |
| Item 4                       |                     | 9489                                       |                          | 208 (2.14)             |
| Item 5                       |                     | 9487                                       |                          | 210 (2.17)             |
| Item 6                       |                     | 9486                                       |                          | 211 (2.18)             |
| Item 7                       |                     | 9487                                       |                          | 210 (2.17)             |
| Item 8                       |                     | 9485                                       |                          | 212 (2.19)             |
| Generalized anxiety symptoms | 2                   | Less than 8 responses =1                   | 8483                     | 235 (2.70)             |
| Item 1                       |                     | 8484                                       |                          | 234 (2.68)             |
| Item 2                       |                     | 8484                                       |                          | 234 (2.68)             |
| Item 3                       |                     | 8483                                       |                          | 235 (2.70)             |
| Item 4                       |                     | 8483                                       |                          | 235 (2.70)             |
| Item 5                       |                     | 8484                                       |                          | 234 (2.68)             |
| Item 6                       |                     | 8483                                       |                          | 235 (2.70)             |
| Item 7                       |                     | 8481                                       |                          | 237 (2.72)             |
| Item 8                       |                     | 8483                                       |                          | 235 (2.70)             |
| Item 9                       |                     | 8482                                       |                          | 236 (2.70)             |
| Item 10                      |                     | 8483                                       |                          | 235 (2.70)             |
| Early-Life adversities       | 2                   |                                            | 8607                     | 111 (1.27)             |
| Item 1                       |                     | 8644                                       |                          | 74 (0.85)              |
| Item 2                       |                     | 8640                                       |                          | 78 (0.89)              |
| Item 3                       |                     | 8628                                       |                          | 90 (1.03)              |
| Item 4                       |                     | 8629                                       |                          | 89 (1.02)              |
| Item 5                       |                     | 8625                                       |                          | 93 (1.07)              |
| Item 6                       |                     | 8624                                       |                          | 94 (1.08)              |
| Item 7                       |                     | 8626                                       |                          | 92 (1.06)              |
| Item 8                       |                     | 8621                                       |                          | 97 (1.11)              |
| Intimate Partner violence    | 1                   |                                            | 9225                     | 472 (4.87)             |
| Item 1                       |                     | 9226                                       |                          | 471 (4.86)             |
| Item 2                       |                     | 9238                                       |                          | 459 (4.73)             |
| Item 3                       |                     | 9222                                       |                          | 475 (4.90)             |
| Item 4                       |                     | 9228                                       |                          | 469 (4.84)             |
| Item 5                       |                     | 9214                                       |                          | 483 (4.98)             |
| Item 6                       |                     | 9232                                       |                          | 465 (4.80)             |

## Supplementary Table S1 continued

|                             |   |                                  |      |             |
|-----------------------------|---|----------------------------------|------|-------------|
| Other illicit drugs         | 2 |                                  | 8396 | 322 (3.69)  |
| Item 1                      |   | 2689                             |      | 31 (1.14)*  |
| Item 2                      |   | 2714                             |      | 6 (0.22)*   |
| Item 3                      |   | 2699                             |      | 21 (0.77)*  |
| Item 4                      |   | 2712                             |      | 8 (0.29)*   |
| Item 5                      |   | 2716                             |      | 4 (0.15)*   |
| Item 6                      |   | 2715                             |      | 5 (0.18)*   |
| Item 7                      |   | 2715                             |      | 5 (0.18)*   |
| AUDIT                       | 2 | Less than 8<br>responses=1, qc=7 | 8531 | 187 (2.14)  |
| Item 1                      |   | 8178                             |      | 3 (0.04)*   |
| Item 2                      |   | 7415                             |      | 7 (0.09)**  |
| Item 3                      |   | 7412                             |      | 10 (0.13)** |
| Item 4                      |   | 7411                             |      | 11 (0.15)** |
| Item 5                      |   | 7414                             |      | 8 (0.11)**  |
| Item 6                      |   | 7410                             |      | 12 (0.16)** |
| Item 7                      |   | 7412                             |      | 10 (0.13)** |
| Item 8                      |   | 7413                             |      | 8 (0.11)**  |
| Item 9                      |   | 7413                             |      | 9 (0.12)**  |
| Item 10                     |   | 7414                             |      | 8 (0.11)**  |
| Cannabis                    | 2 |                                  | 8373 | 345 (3.96)  |
| Item 1                      |   | 2319                             |      | 0 (0.00)*   |
| Item 2                      |   | 2319                             |      | 0 (0.00)*   |
| Item 3                      |   | 2318                             |      | 1 (0.04)*   |
| Item 4                      |   | 2318                             |      | 1 (0.04)*   |
| Item 5                      |   | 2315                             |      | 4 (0.17)*   |
| Item 6                      |   | 2317                             |      | 2 (0.09)*   |
| Lifetime sexual<br>partners | 1 | 8972                             |      | 725 (7.48)  |

Sexual orientation: \*missing includes 216 participants who were unsure or had no sexual interest

Alcohol: \*n=8181, 371 had never taken alcohol; \*\*n=7422, 759 responded never or almost never to first AUDIT question

Smoking: \*n = 1118 (3712 had never smoked cigarettes, 3686 were not currently smoking)

Cannabis: \*n=2319 (4213 had never used cannabis, 1844 had not used cannabis in the last 12 months)

Other illicit drugs: \*n=2720 (5696 had never used any illicit drugs)

Qc = quality control item

**Supplementary Table S2***Complete and incomplete twin pairs by sex and zygosity per variable*

| Variable                        | MZM<br>Complete/<br>Incomplete | DZM<br>Complete/<br>Incomplete | MZF<br>Complete/<br>Incomplete | DZF<br>Complete/<br>Incomplete | DZO<br>Complete/<br>Incomplete | Complete<br>MZ/DZ | Total<br>individuals |
|---------------------------------|--------------------------------|--------------------------------|--------------------------------|--------------------------------|--------------------------------|-------------------|----------------------|
| Sexual orientation              | 479/182                        | 389/242                        | 964/252                        | 772/313                        | 1070/683                       | 1443/2231         | 9010                 |
| Depressive symptoms             | 479/185                        | 403/232                        | 975/242                        | 785/304                        | 1086/681                       | 1454/2274         | 9100                 |
| Generalized anxiety<br>symptoms | 423/176                        | 320/262                        | 895/249                        | 731/294                        | 898/707                        | 1318/1949         | 8222                 |
| Early-Life adversities          | 429/187                        | 323/269                        | 908/252                        | 733/296                        | 920/711                        | 1337/1976         | 8341                 |
| Intimate Partner violence       | 455/193                        | 375/250                        | 964/248                        | 777/308                        | 1048/698                       | 1419/2200         | 8935                 |
| Other illicit drugs             | 416/188                        | 318/262                        | 877/271                        | 698/322                        | 877/726                        | 1293/1893         | 8141                 |
| AUDIT                           | 426/181                        | 321/265                        | 902/255                        | 727/300                        | 904/710                        | 1328/1952         | 8271                 |
| Cannabis                        | 409/193                        | 307/273                        | 877/272                        | 697/320                        | 873/734                        | 1286/1877         | 8118                 |
| Lifetime Sexual Partners        | 449/200                        | 360/261                        | 913/274                        | 715/350                        | 1011/707                       | 1362/2086         | 8688                 |

MZM and MZF = Monozygotic same-sex male and female twin pairs respectively, DZM, DZF  
and DZO = Dizygotic same-sex male, female and opposite-sex twin pairs respectively.

**Supplementary Table S3**

*Within-individual and cross-twin pair correlations and standard errors for observed variables by zygosity.*

|               | 1. Sexual orientation (SE) | 2. Depressive symptoms (SE) | 3. Generalized Anxiety symptoms (SE) | 4. ELA (SE) | 5. IPV (SE) | 6. Other illicit drug use (SE) | 7. Alcohol use (SE) | 8. Cannabis use (SE) | 9. LSP (SE) |
|---------------|----------------------------|-----------------------------|--------------------------------------|-------------|-------------|--------------------------------|---------------------|----------------------|-------------|
| Within-person |                            |                             |                                      |             |             |                                |                     |                      |             |
| 1.            | 1.00                       |                             |                                      |             |             |                                |                     |                      |             |
| 2.            | .22 (.01)                  | 1.00                        |                                      |             |             |                                |                     |                      |             |
| 3.            | .24 (.02)                  | .53 (.01)                   | 1.00                                 |             |             |                                |                     |                      |             |
| 4.            | .19 (.02)                  | .26 (.01)                   | .27 (.01)                            | 1.00        |             |                                |                     |                      |             |
| 5.            | .09 (.01)                  | .24 (.01)                   | .22 (.01)                            | .21 (.01)   | 1.00        |                                |                     |                      |             |
| 6.            | .15 (.02)                  | .09 (.01)                   | .11 (.01)                            | .13 (.01)   | .13 (.01)   | 1.00                           |                     |                      |             |
| 7.            | .07 (.02)                  | .09 (.01)                   | .09 (.01)                            | .08 (.01)   | .06 (.01)   | .43 (.01)                      | 1.00                |                      |             |
| 8.            | .06 (.02)                  | .06 (.01)                   | .07 (.01)                            | .10 (.01)   | .09 (.01)   | .45 (.01)                      | .19 (.01)           | 1.00                 |             |
| 9.            | .11 (.01)                  | .06 (.02)                   | .01 (.02)                            | .09 (.02)   | .21 (.01)   | .36 (.01)                      | .39 (.01)           | .15 (.01)            | 1.00        |

SE = Standard error, ELA = Early-Life Adversity, IPV = Intimate Partner Violence, LSP = Lifetime Sexual Partners

MZ = Monozygotic twins. DZ = Dizygotic twins

### Supplementary Table S4

*Within-individual and cross-twin pair correlations for latent factors by zygosity*

|                        | Sexual<br>Orientation<br>1.     | Psychosocial<br>Adversity<br>2.   | Substance Use<br>3. | Lifetime Sexual<br>Partners<br>4. |
|------------------------|---------------------------------|-----------------------------------|---------------------|-----------------------------------|
| <b>Within-person</b>   |                                 |                                   |                     |                                   |
| 1.                     | 1.00                            |                                   |                     |                                   |
| 2.                     | .33 (.29, .36)                  | 1.00                              |                     |                                   |
| 3.                     | .17 (.14, .21)                  | .21 (.18, .24)                    | 1.00                |                                   |
| 4.                     | .11 (.08, .14)                  | .10 (.08, .13)                    | .46 (.44, .49)      | 1.00                              |
| <b>Cross-twin MZ</b>   |                                 |                                   |                     |                                   |
| 1.                     | .56 (.49, .63)                  |                                   |                     |                                   |
| 2.                     | .22 (.17, .27)                  | .67 (.62, .72)                    |                     |                                   |
| 3.                     | .10 (.06, .15)                  | .15 (.11, .19)                    | .95 (.91, .99)      |                                   |
| 4.                     | .06 (.02, .10)                  | .07 (.03, .10)                    | .39 (.36, .42)      | .59 (.56, .062)                   |
| <b>Cross-twin DZ</b>   |                                 |                                   |                     |                                   |
| 1.                     | .22 (.14, .30)                  |                                   |                     |                                   |
| 2.                     | .14 (.09, .19)                  | .34 (.28, .39)                    |                     |                                   |
| 3.                     | .07 (.02, .12)                  | .08 (.04, .12)                    | .48 (.43, .53)      |                                   |
| 4.                     | .02 (-.02, .06)                 | .04 (.00, .07)                    | .24 (.20, .27)      | .30 (.26, .34)                    |
|                        | Standardised<br>factor loadings | Standardised<br>residual variance |                     |                                   |
| Sexual orientation     | 1.00                            |                                   |                     |                                   |
| Depressive symptoms    | .50 (.48, .53)                  | .50 (.47, .52)                    |                     |                                   |
| GA symptoms            | .51 (.48, .54)                  | .49 (.46, .52)                    |                     |                                   |
| ELA                    | .17 (.15, .19)                  | .83 (.81, .85)                    |                     |                                   |
| IPV                    | .12 (.11, .14)                  | .88 (.86, .89)                    |                     |                                   |
| Other illicit drug use | .67 (.64, .71)                  | .33 (.29, .36)                    |                     |                                   |
| Alcohol use            | .29 (.27, .31)                  | .71 (.69, .73)                    |                     |                                   |
| Cannabis use           | .26 (.24, .28)                  | .74 (.72, .76)                    |                     |                                   |
| LSP                    | 1.00                            |                                   |                     |                                   |

GA = Generalized Anxiety, ELA = Early-Life Adversity, IPV = Intimate Partner Violence, LSP = Lifetime Sexual Partners

MZ = Monozygotic twins, DZ = Dizygotic twins

**Supplementary Table S5***Measurement invariance for phenotypic mediation model in male and female participants*

| <b>Model</b>                     | <b><math>\chi^2</math> (df)</b> | <b>Comparison model</b> | <b><math>\Delta\chi^2</math> (<math>\Delta</math>df)</b> | <b>Decision</b> |
|----------------------------------|---------------------------------|-------------------------|----------------------------------------------------------|-----------------|
| M1: Configural Invariance        | 233860.9 (76828)                | -                       | -                                                        | -               |
| M2: Metric Invariance            | 234220.4 (76833)                | M1                      | 359.50 (5)***                                            | Reject          |
| M2a: Partial Metric Invariance   | 233862.2 (76830)                | M1                      | 1.34 (2)                                                 | Accept          |
| M3: Scalar Invariance            | 234743.9 (76835)                | M2a                     | 881.68 (5)***                                            | Reject          |
| M3a: Partial scalar Invariance   | 233865.5 (76832)                | M2a                     | 3.23 (2)                                                 | Accept          |
| M4: Residual Invariance          | 236021.5 (76839)                | M3a                     | 2155.99 (7)***                                           | Reject          |
| M4a: Partial Residual Invariance | 233866.3 (76833)                | M3a                     | 0.82 (1)                                                 | Accept          |

Notes: \*  $p < 0.05$ , \*\*  $p < 0.01$ , \*\*\*  $p < 0.001$ .

df = degrees of freedom,  $\Delta$ df = change in degrees of freedom

**Supplementary Table S6***Phenotypic mediation relationships between latent factors*

|                         | Estimate | 95% CI       |
|-------------------------|----------|--------------|
| Direct effect           |          |              |
| SO -> LSP               | .04      | (.03, .07)   |
| Mediation paths         |          |              |
| SO -> PSA               | .32      | (.29, .33)   |
| SO -> SU                | .11      | (.07, .12)   |
| PSA -> SU               | .17      | (.17, .18)   |
| PSA -> LSP              | .00      | (-.01, .00)  |
| SU -> LSP               | .45      | (.42, .45)   |
| Indirect effect         | .07      | (.07, .08)   |
| Total effect            | .11      | (.10, .14)   |
| Proportion mediated (%) | 67.3     | (48.5, 94.9) |

  

| Variables                | Standardised factor loadings | Standardised residual variance |
|--------------------------|------------------------------|--------------------------------|
| Sexual orientation       | 1.00                         |                                |
| Depressive symptoms      | .50 (.50, .51)               | .50 (.49, .50)                 |
| Anxiety symptoms         | .51 (.50, .51)               | .49 (.46, .52)                 |
| ELA                      | .17 (.15, .17)               | .83 (.83, .85)                 |
| IPV                      | .12 (.12, .13)               | .88 (.87, .88)                 |
| Other illicit drug use   | .70 (.69, .70)               | .30 (.30, .33)                 |
| Alcohol use              | .28 (.28, .31)               | .72 (.70, .74)                 |
| Cannabis use             | .26 (.24, .28)               | .74 (.74, .74)                 |
| Lifetime sexual partners | 1.00                         |                                |

*Note.* SO, PSA, SU and LSP = Sexual orientation, Psychosocial adversity, and Lifetime sexual partners latent factors respectively. ELA, IPV = Early-Life Adversity and Intimate Partner Violence variables respectively. Indirect effect derived as a sum of the indirect effects through the individual mediation paths. Model fit indices: -2LL = 241978.6, df = 76873, Model fit not significantly worse when the PSA-RSB path is dropped  $\chi^2 [1] = 0.03, p = 0.87$ .



Figure S1

*Phenotypic factor mediation model*

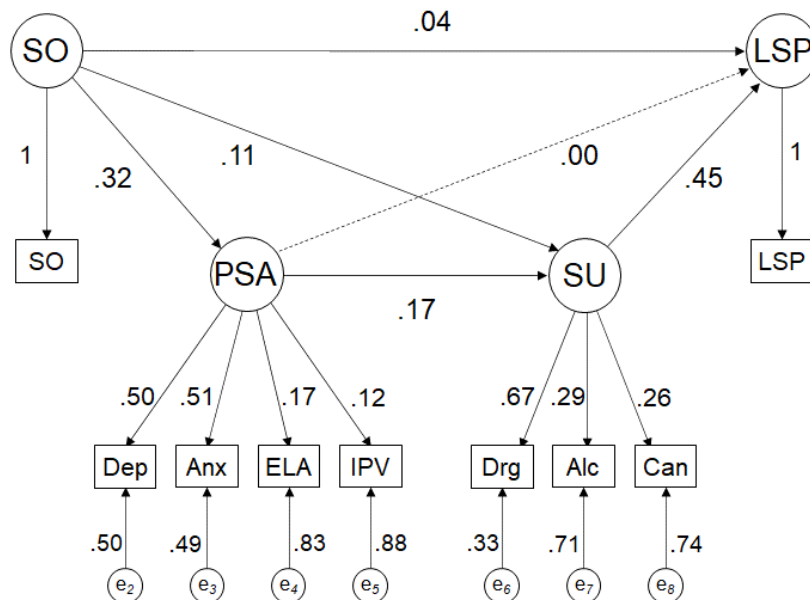

*Note.* Path diagram depicting mediation relationships between Sexual Orientation (SO), Psychosocial Adversity (PSA), SU (Substance Use) and Lifetime Sexual Partners (LSP) latent factors with standardised path coefficients. Factors were scaled by fixing one loading per factor to 1. SO = Sexual orientation, Dep = Depressive symptoms, Anx = Generalised anxiety symptoms, Alc = Alcohol Use, Can = Cannabis use, Drg = Other illicit drug use, ELA = Early-life adversity, IPV = Intimate partner violence.  $e_1 - e_7$  = residual variances for corresponding indicator variables. Solid lines indicate significant paths while dotted lines indicate nonsignificant paths.

**Supplementary Table S7***Phenotypic mediation relationships between latent factors in males and females*

|                         | Male     |                | Female   |               |
|-------------------------|----------|----------------|----------|---------------|
|                         | Estimate | 95% CI         | Estimate | 95% CI        |
| Direct effect           |          |                |          |               |
| SO -> LSP               | .09      | (0.04, 0.14)   | -.03     | (-0.07, 0.01) |
| Mediation paths         |          |                |          |               |
| SO -> PSA               | .30      | (0.24, 0.35)   | .34      | (0.30, 0.38)  |
| SO -> SU                | .07      | (0.01, 0.12)   | .15      | (0.10, 0.19)  |
| PSA -> SU               | .23      | (0.18, 0.28)   | .22      | (0.18, 0.27)  |
| PSA -> LSP              | -.07     | (-0.12, -0.02) | -.01     | (-0.05, 0.02) |
| SU -> LSP               | .45      | (0.40, 0.49)   | .53      | (0.50, 0.57)  |
| Indirect effect         | .04      | (0.01, 0.07)   | .11      | (0.09, 0.14)  |
| Total effect            | .13      | (0.08, 0.17)   | .09      | (0.05, 0.12)  |
| Proportion mediated (%) | 31.1     | (29.2, 26.9)   | 130.6    | (88.9, 291.3) |

  

| Variables                | Standardised factor loadings | Standardised residual variance | Standardised factor loadings | Standardised residual variance |
|--------------------------|------------------------------|--------------------------------|------------------------------|--------------------------------|
| Sexual orientation       | 1.00                         | .00                            | 1.00                         | .00                            |
| Depressive symptoms      | 0.52 (0.47, 0.57)            | 0.48 (0.43, 0.53)              | 0.49 (0.46, 0.52)            | 0.51 (0.48, 0.54)              |
| Anxiety symptoms         | 0.54 (0.49, 0.59)            | 0.46 (0.41, 0.51)              | 0.50 (0.46, 0.53)            | 0.50 (0.47, 0.54)              |
| ELA                      | 0.13 (0.10, 0.16)            | 0.87 (0.84, 0.90)              | 0.19 (0.16, 0.22)            | 0.81 (0.78, 0.84)              |
| IPV                      | 0.08 (0.06, 0.11)            | 0.92 (0.89, 0.94)              | 0.14 (0.12, 0.17)            | 0.86 (0.83, 0.88)              |
| Other illicit drug use   | 0.76 (0.72, 0.80)            | 0.24 (0.20, 0.28)              | 0.54 (0.50, 0.58)            | 0.46 (0.42, 0.50)              |
| Alcohol use              | 0.27 (0.24, 0.31)            | 0.73 (0.69, 0.76)              | 0.35 (0.32, 0.39)            | 0.65 (0.61, 0.68)              |
| Cannabis use             | 0.37 (0.33, 0.40)            | 0.63 (0.60, 0.67)              | 0.18 (0.15, 0.20)            | 0.82 (0.80, 0.85)              |
| Lifetime sexual partners | 1.00                         | .00                            | 1.00                         | .00                            |

*Note.* SO, PSA, SU and LSP = Sexual orientation, Psychosocial adversity, and Lifetime sexual partners latent factors respectively. ELA, IPV = Early-Life Adversity and Intimate Partner Violence variables respectively. Indirect effect derived as a sum of the indirect effects through the individual mediation paths.

**Figure S2a***Genetic Model 1*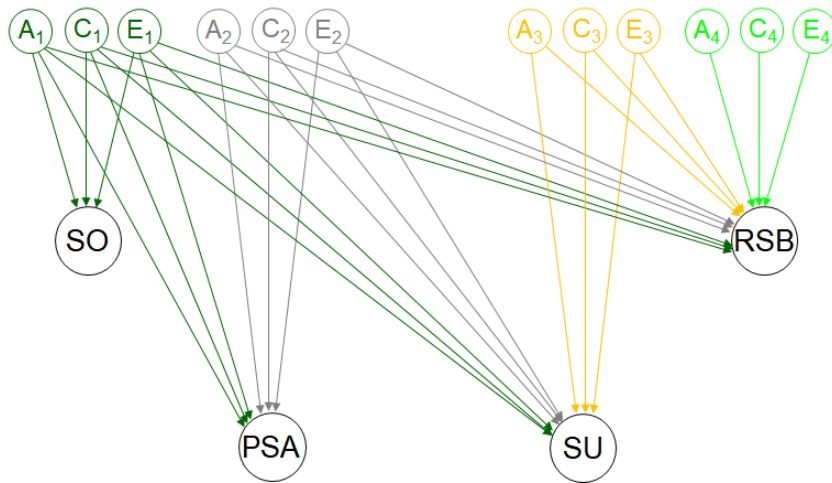

*Note.* Path diagram depicting the Cholesky decomposition whereby the relationships between Sexual Orientation (SO), Psychosocial Adversity (PSA), SU (Substance Use) and Risky Sexual Behavior (RSB) latent factors are completely explained in terms of additive genetic (A), shared and individual-specific environmental (C and E respectively) influences. Better fit of this model compared with the biometric mediation model indicates that genetic and environmental influences confound the mediation relationships between SO, PSA, SU and RSB. Subscripts <sub>1</sub>, <sub>2</sub>, <sub>3</sub>, and <sub>4</sub> indicate ACE influences specific to SO, PSA, SU and RSB latent factors respectively; indicator variables were omitted for ease of presentation.

Figure S2b

## Genetic Model 2

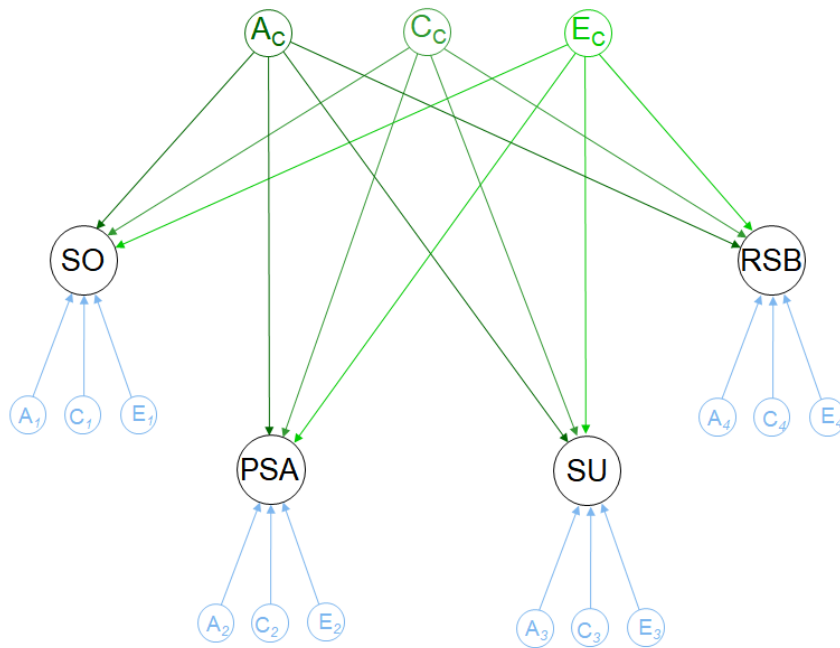

*Note.* Path diagram depicting the Common Factor Independent Pathway (CFIP) model whereby the relationships between Sexual Orientation (SO), Psychosocial Adversity (PSA), SU (Substance Use) and Risky Sexual Behavior (RSB) latent factors can be understood as pleiotropic influences of shared additive genetic and shared and individual-specific environmental ( $A_c$ ,  $C_c$  and  $E_c$  respectively, color green) while ACE influences specific to the latent factors are additionally specified as  $A_1C_1E_1$  to  $A_4C_4E_4$  respectively (color blue). Better fit of this model compared with the biometric mediation model indicates that pleiotropic  $A_cC_cE_c$  influences on the latent factors confound the mediation relationships between SO, PSA, SU and RSB. Indicator variables were omitted for ease of presentation.

**Supplementary Table S8***Comparison of model fit indices of the genetic factor models*

| <b>Models</b>               | <b>Parameters</b> | <b>df</b> | <b>-2LL</b> | <b>AIC</b> | <b>BIC</b> |
|-----------------------------|-------------------|-----------|-------------|------------|------------|
| <b>Main analyses</b>        |                   |           |             |            |            |
| <b>With 10 variables</b>    |                   |           |             |            |            |
| <b>Cholesky</b>             | 70                | 76847     | 240106.4    | 86412.43   | -427290    |
| <b>CFIP</b>                 | 64                | 76853     | 240142.7    | 86436.70   | -427306    |
| <b>Biometric mediation</b>  | 58                | 76859     | 240119.6    | 86401.55   | -427381    |
| <b>Sensitivity analysis</b> |                   |           |             |            |            |
| <b>With 6 variables</b>     |                   |           |             |            |            |
| <b>Cholesky</b>             | 44                | 51567     | 165258.2    | 62124.22   | -282588    |
| <b>CFIP</b>                 | 44                | 51567     | 165266.9    | 62132.93   | -282579    |
| <b>Biometric mediation</b>  | 38                | 51573     | 165264.9    | 62118.85   | -282633    |

*Note.* CFIP = Common Factor-Independent Pathway model

**Supplementary Table S9**

*Standardised variance components influences on latent factors and standardised path coefficients in the biometric mediation model*

| Latent factors           | $h^2$          | $c^2$          | $e^2$          |
|--------------------------|----------------|----------------|----------------|
| Sexual orientation       | .56 (.44, .62) | .00 (.00, .10) | .44 (.38, .50) |
| Psychosocial adversity   | .59 (.49, .64) | .00 (.00, .08) | .41 (.36, .46) |
| Substance use            | .80 (.70, .86) | .03 (.04, .12) | .17 (.14, .20) |
| Lifetime sexual partners | .58 (.52, .61) | .01 (.01, .05) | .42 (.39, .45) |

  

| Path coefficients and mediated effects | Estimate | 95% CI       |
|----------------------------------------|----------|--------------|
| Direct effect                          |          |              |
| SO -> LSP                              | .04      | (.01, .07)   |
| Mediation paths                        |          |              |
| SO -> PSA                              | .32      | (.29, .35)   |
| SO -> SU                               | .11      | (.08, .25)   |
| PSA -> SU                              | .16      | (.13, .20)   |
| PSA -> LSP                             | -.01     | (-.04, .02)  |
| SU -> LSP                              | .44      | (.42, .47)   |
| Indirect effect                        | .07      | (.05, .09)   |
| Total effect                           | .11      | (.08, .14)   |
| Proportion mediated (%)                | 65.8     | (47.0, 93.4) |

  

| Variables                | Standardised factor loadings | As             | Cs             | ES             |
|--------------------------|------------------------------|----------------|----------------|----------------|
| Sexual orientation       | 1.00                         |                |                |                |
| Depressive symptoms      | .51 (.48, .54)               | .03 (.00, .06) | .00 (.00, .04) | .46 (.42, .49) |
| Anxiety symptoms         | .52 (.49, .55)               | .09 (.04, .12) | .00 (.00, .03) | .39 (.36, .43) |
| ELA                      | .15 (.13, .17)               | .35 (.27, .44) | .18 (.10, .24) | .32 (.29, .35) |
| IPV                      | .12 (.10, .13)               | .17 (.09, .21) | .00 (.00, .06) | .71 (.67, .75) |
| Other illicit drug use   | .71 (.67, .76)               | .06 (.02, .10) | .00 (.00, .02) | .23 (.20, .25) |
| Alcohol use              | .27 (.25, .30)               | .32 (.26, .35) | .00 (.00, .05) | .41 (.38, .44) |
| Cannabis use             | .25 (.23, .27)               | .45 (.42, .49) | .00 (.00, .01) | .30 (.27, .33) |
| Lifetime sexual partners | 1.00                         |                |                |                |

SO, PSA, SU and LSP = Sexual orientation, Psychosocial adversity, and Lifetime sexual partners latent factors respectively. ELA, IPV = Early-Life Adversity and Intimate Partner Violence variables respectively. Indirect effect derived as a sum of the indirect effects through the individual mediation paths.  $h^2$ ,  $c^2$ ,  $e^2$  = Standardised proportions contributed by additive genetic, shared and unique environmental factors, respectively. As, Cs and Es = Standardised variable-specific additive genetic, shared and individual-specific influences.

Figure S3:

*Biometric mediation model.*

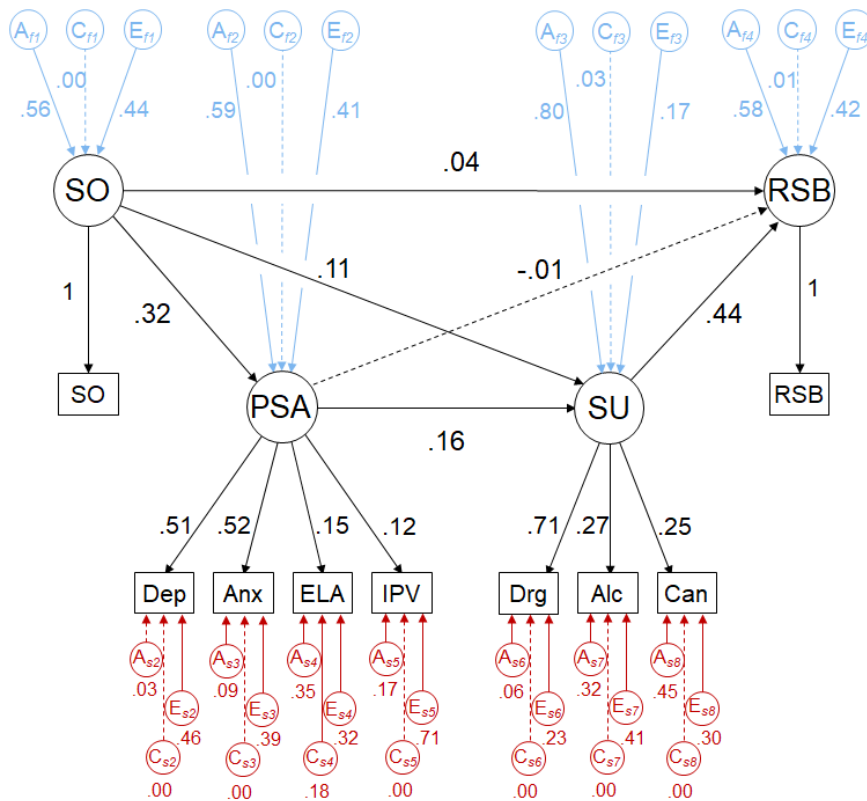

*Note.* Path diagram depicting mediation relationships between Sexual Orientation (SO), Psychosocial adversity (PSA), Substance use (SU) and Lifetime Sexual Partners (LSP) latent factors, standardised variance component influences on latent factors and standardised path coefficients. Factors were scaled by fixing one loading per factor to 1. SO = Sexual orientation, Dep = Depressive symptoms, Anx = Generalised anxiety symptoms, ELA = Early-life adversity, IPV = Intimate partner violence, Drg = Other illicit drug use, Alc = Alcohol Use, Can = Cannabis use.  $A_{f1}$ - $A_{f4}$ ,  $C_{f1}$ - $C_{f4}$  and  $E_{f1}$ - $E_{f4}$  = Factor-specific additive genetic and shared and individual-specific environmental influences respectively (in blue).  $A_{s2}$ - $A_{s8}$ ,  $C_{s2}$ - $C_{s8}$  and  $E_{s2}$ - $E_{s8}$  = Variable-specific additive genetic, shared and individual-specific environmental influences respectively (in red). Solid lines indicate significant paths while dotted lines indicate nonsignificant paths.

## Supplementary Table S12

*Standardised variance components influences on latent factors and standardised path coefficients in the biometric mediation model in males and females*

| Males                     |                |                |                | Females        |                |                |  |
|---------------------------|----------------|----------------|----------------|----------------|----------------|----------------|--|
| Latent factors            | h <sup>2</sup> | c <sup>2</sup> | e <sup>2</sup> | h <sup>2</sup> | c <sup>2</sup> | e <sup>2</sup> |  |
| Sexual orientation        | .52 (.49, .63) | .01 (.01, .27) | .48 (.36, .61) | .54 (.30, .65) | .04 (.03, .24) | .42 (.35, .50) |  |
| Psychosocial adversity    | .47 (.18, .60) | .04 (.00, .28) | .48 (.39, .59) | .60(.41, .68)  | .03 (.00, .19) | .37 (.31, .44) |  |
| Substance use             | .48 (.28, .47) | .34 (.31, .51) | .19 (.14, .24) | .76 (.76, .81) | .02 (.00, .03) | .22 (.18, .27) |  |
| Lifetime sexual; partners | .43 (.26, .55) | .16 (.16, .30) | .41 (.36, .47) | .55 (.45, .60) | .03 (.00, .12) | .42 (.39, .46) |  |

  

| Path coefficients and mediated effects | Estimate | 95% CI       | Estimate | 95% CI         |
|----------------------------------------|----------|--------------|----------|----------------|
| Direct effect                          |          |              |          |                |
| SO -> LSP                              | .09      | (.04, .15)   | -.03     | (-.07, .01)    |
| Mediation paths                        |          |              |          |                |
| SO -> PSA                              | .29      | (.24, .35)   | .34      | (.30, .38)     |
| SO -> SU                               | .07      | (.01, .13)   | .15      | (.10, .20)     |
| PSA -> SU                              | .22      | (.17, .27)   | .22      | (.18, .27)     |
| PSA -> LSP                             | -.07     | (-.12, -.03) | -.02     | (-.06, .01)    |
| SU -> LSP                              | .44      | (.40, .48)   | .53      | (.50, .57)     |
| Indirect effect                        | .04      | (.01, .07)   | .11      | (.09, .14)     |
| Total effect                           | .13      | (.08, .18)   | .08      | (.05, .12)     |
| Proportion mediated (%)                | 28.6     | (21.9, 31.0) | 137.4    | (101.0, 241.3) |

  

| Variables                | Standardised factor loadings | As             | Cs             | Es             | Standardised factor loadings | As             | Cs             | Es             |
|--------------------------|------------------------------|----------------|----------------|----------------|------------------------------|----------------|----------------|----------------|
| Sexual orientation       | 1.00                         |                |                |                | 1.00                         |                |                |                |
| Depressive symptoms      | .52 (.47, .58)               | .00 (.00, .09) | .04 (.00, .09) | .43 (.38, .49) | .50 (.47, .54)               | .04 (.00, .08) | .00 (.00, .06) | .46 (.42, .51) |
| Anxiety symptoms         | .54 (.49, .60)               | .07 (.00, .13) | .00 (.00, .07) | .38 (.32, .45) | .51 (.48, .55)               | .09 (.02, .13) | .00 (.00, .05) | .40 (.35, .44) |
| ELA                      | .13 (.10, .16)               | .46 (.09, .53) | .07 (.02, .39) | .34 (.30, .40) | .16 (.14, .19)               | .20 (.10, .31) | .33 (.23, .43) | .30 (.27, .34) |
| IPV                      | .08 (.06, .10)               | .20 (.06, .28) | .00 (.00, .11) | .72 (.65, .79) | .13 (.11, .16)               | .16 (.06, .21) | .00 (.00, .08) | .71 (.65, .76) |
| Other illicit drug use   | .75 (.70, .71)               | .08 (.01, .14) | .00 (.00, .04) | .17 (.13, .21) | .54 (.49, .58)               | .07 (.00, .18) | .07 (.00, .16) | .32 (.28, .36) |
| Alcohol use              | .27 (.24, .31)               | .28 (.13, .35) | .01 (.00, .14) | .44 (.38, .50) | .34 (.30, .37)               | .26 (.14, .33) | .03 (.02, .14) | .37 (.33, .41) |
| Cannabis use             | .36 (.33, .40)               | .13 (.00, .25) | .10 (.01, .22) | .41 (.34, .49) | .19 (.17, .22)               | .21 (.10, .28) | .03 (.00, .11) | .57 (.52, .63) |
| Lifetime sexual partners | 1.00                         |                |                |                | 1.00                         |                |                |                |

*Note.* SO, PSA, SU and LSP = Sexual orientation, Psychosocial adversity, and Lifetime sexual partners latent factors respectively. ELA, IPV = Early-Life Adversity and Intimate Partner Violence variables respectively. Indirect effect derived as a sum of the indirect effects through the individual mediation paths. h<sup>2</sup>, c<sup>2</sup>, e<sup>2</sup> = Standardised proportions contributed by additive genetic, shared and unique environmental factors, respectively. As, Cs and Es = Standardised variable-specific additive genetic, shared and individual-specific influences. Model fit indices: degrees of freedom = 76804, -2LL = 232340.3, AIC = 78732.32.
